# Supplementary material for: Characteristics and innovative points of clinical trials of radiotherapy combined with immune checkpoint inhibitors in NSCLC over the past decade
Source: Frontiers journal article supplement (doi:10.3389/fmed.2025.1598505), 2025-07-22
Supplement: Data_Sheet_1.xlsx [file Data_Sheet_1.xlsx]

## Sheet: Table 1
Table 1. Characteristics of iRT clinical trials for NSCLC registered on ClinicalTrials.gov
Characteristic		N (%), n=196
Year
	2014-2017	44 (22.4)
	2018-2020	62 (31.6)
	2021-2024	90 (45.9)
Age
	Adult, older adult	193 (98.5)
	Child, adult, older adult	2 (1.0)
	Older adult	1 (0.5)
Tumor Stage
	I	6 (3.1)
	I-II	8 (4.1)
	I-III	7 (3.6)
	II-III	25 (12.8)
	II-IV	1 (0.5)
	III	61 (31.1)
	Oligoprogressive	2 (1.0)
	III-IV	10 (5.1)
	Oligometastatic, oligoresidual	1 (0.5)
	IV	78 (39.8)
	Oligometastatic, oligoprogressive	16 (8.2)
	Brain or leptomeningeal metastasis	12 (6.1)
Sponsor
	Hospital	93 (47.4)
	University	55 (28.1)
	Research institutions	18 (9.2)
	Company	14 (7.1)
	Oncology cooperation organization	10 (5.1)
	Foundation	6 (3.1)
Funder Type
	Industry	16 (8.2)
	NIH	6 (3.1)
	Network	3 (1.5)
	FED	2 (1.0)
	Other GOV	2 (1.0)
	Other	167 (85.2)
Locations
	North America	95 (48.5)
	Asia	58 (29.6)
	Europe	40 (20.4)
	Oceania	2 (1.0)
	South America	1 (0.5)
Study Status
	Recruiting	69 (35.2)
	Active not recruiting	38 (19.4)
	Completed	29 (14.8)
	Unknown	20 (10.2)
	Not yet recruiting	15 (7.7)
	Terminated	15 (7.7)
	Withdrawn	9 (4.6)
	Suspended	1 (0.5)
Study Results
	Yes	20 (10.2)
	No	176 (89.8)
Reasons for Trial Failure
	Due to slow accrual	11 (44.0)
	Safety	4 (16.0)
	Lack of funding	3 (12.0)
	Sponsor strategic or business decision	2 (8.0)
	Pending a protocol amendment	1 (4.0)
	Work commitments	1 (4.0)
	Due to the delay in the study shceduled, due to the start of competitive study	1 (4.0)
	Another treatment found efficacious	1 (4.0)
	Clincal decision based on previous results	1 (4.0)

## Sheet: Table 2
Table 2. Study design element of iRT clinical trials for NSCLC
Characteristic		N (%), n=196
Study Type
	Interventional	196 (100)
Phase
	Early phase 1	4 (2.0)
	Phase 1	22 (11.2)
	Phase1| Phase 2	17 (8.7)
	Phase 2	110 (56.1)
	Phase 2| Phase 3	2 (1.0)
	Phase 3	23 (11.7)
	Phase 4	1 (0.5)
	NA	17 (8.7)
Single Center or Multi Center
	Single	107 (54.6)
	Multi	89 (45.4)
Enrollment
	＜50	109 (55.6）
	≥50,<100	41 (20.9)
	≥100,<200	27 (13.8)
	≥200,<500	15 (7.7)
	≥500	4 (2.0)
Primary Purpose
	Treatment	189 (96.4)
	Supportive care	2 (1.0)
	Prevention	2 (1.0)
	Diagnostic	1 (0.5)
	Basic science	1 (0.5)
	Other	1 (0.5)
Allocation
	Randomized	72 (36.7)
	Non randomized	29 (14.8)
	NA	95 (48.5)
Interventional Model
	Single group	101 (51.5)
	Parallel	82 (41.8)
	Sequential	12 (6.1)
	Crossover	1 (0.5)
Masking
	None (open label)	183 (93.4)
	Single (investigator)	1 (0.5)
	Single (investigator)	1 (0.5)
	Double (participant, care provider)	1 (0.5)
	Double (participant, investigator)	4 (2.0)
	Triple (participant, care provider, investigator)	1 (0.5)
	Quadruple (participant, care provider, investigator, outcomes assessor)	5 (2.6)
Data Monitoring Committee
	Yes	107 (54.6)
	No	89 (45.4)

## Sheet: Table S1
Table S1. The specific search term
Condition/disease	Other terms	Study Type
NSCLC	radiation and immunotherapy	Interventional
	radiation and immune checkpoint inhibitor
	radiation and PD-1/PD-L1
	radiation and PD-1
	radiation and PD-L1
	radiation and CTLA-4
	radiation and Pembrolizumab
	radiation and Nivolumab
	radiation and Durvalumab
	radiation and Atezolizumab
	radiation and Toripalimab
	radiation and Sintilimab
	radiation and Camrelizumab
	radiation and Tislelizumab
	radiation and Zimberelimab
	radiation and Penpulimab
	radiation and Serplulimab
	radiation and Pucotenlimab
	radiation and Sugemalimab
	radiation and Envafolimab
	radiation and Adebrelimab
	radiation and Ipilimumab
	radiation and Cadonilimab
	radiation and Belatacept
	radiation and Tremelimumab
	radiation and Abatacept
	radiation and Cemiplimab
	radiation and Cetrelimab
	radiation and Benmelstobart

## Sheet: Table S2
Table S2. The detailed statistical data
NCT Number	Study Title	Start Date	Study Status	Reasons for Trial Failure	Study Results	Tumor Stage	Age	Sponsor	Funder Type	Locations	Study Type	Phase	Enrollment	Single Center or Multi Center	Primary Purpose	Allocation	Interventional Model	Masking	Data Monitoring Committee	Immune Checkpoint Inhibitor (ICI)	Radiotherapy Techniques	Radiotherapy Dose	Radiation Field	Radiotherapy Auxiliary Systems	Patient Status	Primary Tumor Site	Metastatic Site	Lymph Nodes	SRT (SRS, SBRT, SABR)	IGRT	VMRT	Proton Radiotherapy	Carbon-ion Radiotherapy	Auxiliary Decision-making System	Minimize Lung Damage	FDG-PET-based Small Volume Radiotherapy	Assess Patterns of Cancer Response	Hypofractionation	Hyperfractionation	Single-fraction	LDRT	Hybrid Dose-fraction Radiotherapy	Other Approaches to Dose Adjustment	Omitting CTV	Grid Therapy	Adaptive Radiotherapy	Dose-painting Radiation	Residual Disease Radiation	Multi-site Radiotherapy
NCT06218069	Immuno-pet iMaging resPonses administeRed Immune checkpoiNt inhibiTor	2024	NOT_YET_RECRUITING		NO	I-II	ADULT, OLDER_ADULT	University	OTHER	Europe	INTERVENTIONAL	PHASE2|PHASE3	＜50	Multi	TREATMENT	NON_RANDOMIZED	PARALLEL	None (Open Label)	0	Sasanlimab	1	1							1									1
NCT04889066	Durvalumab (MEDI4736) and Radiosurgery (fSRT vs. PULSAR) for the Treatment of Non-Small Cell Lung Cancer Brain Metastases	2024	NOT_YET_RECRUITING		NO	IV, Brain Metastasis	ADULT, OLDER_ADULT	University	OTHER	North America	INTERVENTIONAL	PHASE2	＜50	Single	TREATMENT	RANDOMIZED	PARALLEL	None (Open Label)	1	Durvalumab	1	1					1		1									1
NCT06311981	Carbon Ion Radiotherapy for Locally Advanced Lung Cancer in Elderly Patients	2024	RECRUITING		NO	II-III	OLDER_ADULT	Hospital	OTHER	Asia	INTERVENTIONAL	PHASE2	＜50	Single	TREATMENT	NA	SINGLE_GROUP	None (Open Label)	1	Pembrolizumab	1	1			1								1					1
NCT06331585	Effect of Low-dose Radiotherapy on Tumor Immune Microenvironment in Oligometastases of NSCLC After Immunotherapy	2024	WITHDRAWN	work commitments	NO	IV, Oligometastatic	ADULT, OLDER_ADULT	Hospital	OTHER	Asia	INTERVENTIONAL	PHASE2	＜50	Single	BASIC_SCIENCE	NA	SINGLE_GROUP	None (Open Label)	0	ICI		1					1														1
NCT06037733	Primary Tumor Radiotherapy Omitting CTV for Patients With Advanced NSCLC Responded to Immunotherapy and Chemotherapy	2024	RECRUITING		NO	IV	ADULT, OLDER_ADULT	Hospital	OTHER	Asia	INTERVENTIONAL	NA	≥100,<200	Single	PREVENTION	RANDOMIZED	PARALLEL	None (Open Label)	0	ICI			1																					1
NCT06313541	Treatment Response Adapted Hybrid Radiotherapy in Metastatic Non-small Cell Lung Cancer Receiving First-line Immunotherapy	2024	NOT_YET_RECRUITING		NO	IV	ADULT, OLDER_ADULT	University	OTHER	Asia	INTERVENTIONAL	PHASE2	≥100,<200	Multi	TREATMENT	RANDOMIZED	PARALLEL	None (Open Label)	0	ICI	1	1	1		1				1									1			1							1
NCT06275360	Repositioning Immunotherapy in VetArans With Lung Cancer	2024	RECRUITING		NO	III	ADULT, OLDER_ADULT	Research Institutions	FED	North America	INTERVENTIONAL	PHASE2	＜50	Multi	TREATMENT	NA	SINGLE_GROUP	None (Open Label)	1	Nivolumab
NCT06114108	Trial Comparing Systemic Therapy Alone and With Local Ablative Treatment for Stage IV NSCL Cancer Patients	2023	RECRUITING		NO	IV	ADULT, OLDER_ADULT	Oncology Cooperation Organization	OTHER	Europe	INTERVENTIONAL	NA	≥100,<200	Multi	TREATMENT	RANDOMIZED	PARALLEL	None (Open Label)	1	ICI	1	1							1									1
NCT06141070	Addition of Hypofractionated High Dose Radiation in Oligometastatic Disease	2023	NOT_YET_RECRUITING		NO	IV, Oligometastatic	ADULT, OLDER_ADULT	Hospital	OTHER	Europe	INTERVENTIONAL	PHASE3	≥200,<500	Multi	TREATMENT	RANDOMIZED	PARALLEL	None (Open Label)	0	ICI	1	1				1	1		1									1		1
NCT06031597	Radiotherapy Combined With ICIs as Treatment for LA-NSCLC After Failing Induction Immunochemotherapy	2023	NOT_YET_RECRUITING		NO	III	ADULT, OLDER_ADULT	Hospital	OTHER	Asia	INTERVENTIONAL	PHASE3	≥100,<200	Single	TREATMENT	NON_RANDOMIZED	SEQUENTIAL	None (Open Label)	0	ICI	1				1					1	1
NCT05754203	Efficacy and Safety of Super-hyperfractionation Pulse Radiotherapy Combined With ICIs for Advanced NSCLC	2023	RECRUITING		NO	III-IV	ADULT, OLDER_ADULT	Hospital	OTHER	Asia	INTERVENTIONAL	NA	＜50	Single	TREATMENT	NA	SINGLE_GROUP	None (Open Label)	0	ICI		1																	1
NCT06139419	The Impact of Thymosin α-1 on the Efficacy of Concurrent Chemoradiotherapy Followed by Immunotherpay Consolidation for Locally Advanced NSCLC	2023	RECRUITING		NO	III	ADULT, OLDER_ADULT	University	OTHER	Asia	INTERVENTIONAL	PHASE2	≥100,<200	Single	TREATMENT	RANDOMIZED	PARALLEL	None (Open Label)	0	Tislelizumab		1																1
NCT05703269	Comparing Single vs Multiple Dose Radiation for Cancer Patients With Brain Metastasis and Receiving Immunotherapy	2023	RECRUITING		NO	IV, Brain Metastasis	ADULT, OLDER_ADULT	University	OTHER	North America	INTERVENTIONAL	NA	≥200,<500	Multi	SUPPORTIVE_CARE	RANDOMIZED	SEQUENTIAL	None (Open Label)	1	ICI	1	1					1		1									1		1
NCT05443971	Durvalumab and Grid Therapy for Non-small Cell Lung Cancer in Progression During or After Treatment With PACIFIC Regimen	2023	RECRUITING		NO	III	ADULT, OLDER_ADULT	Hospital	OTHER	North America	INTERVENTIONAL	PHASE2	＜50	Single	TREATMENT	NA	SINGLE_GROUP	None (Open Label)	1	Durvalumab		1	1																				1		1
NCT05940532	A Trial of Sugemalimab and Chemotherapy in Unresectable Stage III NSCLC	2023	RECRUITING		NO	III	ADULT, OLDER_ADULT	Hospital	OTHER	Asia	INTERVENTIONAL	PHASE2	＜50	Single	TREATMENT	NA	SINGLE_GROUP	None (Open Label)	0	Sugemalimab
NCT05624996	Testing the Addition of High Dose, Targeted Radiation to the Usual Treatment for Locally-Advanced Inoperable Non-small Cell Lung Cancer	2023	RECRUITING		NO	II-III	ADULT, OLDER_ADULT	Oncology Cooperation Organization	OTHER	North America	INTERVENTIONAL	PHASE3	≥200,<500	Multi	TREATMENT	RANDOMIZED	PARALLEL	None (Open Label)	1	Durvalumab	1	1							1	1								1
NCT05501665	Split Course Adaptive Radiation Therapy With Pembrolizumab With/Without Chemotherapy for Treating Stage IV Lung Cancer	2023	SUSPENDED	Pending a protocol amendment	NO	IV	ADULT, OLDER_ADULT	Hospital	OTHER	North America	INTERVENTIONAL	PHASE1|PHASE2	＜50	Single	TREATMENT	NON_RANDOMIZED	PARALLEL	None (Open Label)	1	Nivolumab, Pembrolizumab, Ipilimumab and Cemiplimab		1	1																				1			1
NCT05888402	Induction Chemotherapy and Toripalimab Followed by Chemoradiotherapy for Large-volume Local Advanced NSCLC	2023	RECRUITING		NO	II-III	ADULT, OLDER_ADULT	Hospital	OTHER	Asia	INTERVENTIONAL	PHASE2	≥50,<100	Single	TREATMENT	RANDOMIZED	SINGLE_GROUP	None (Open Label)	1	Toripalimab						1
NCT05691829	Immunotherapy With Non-Ablative Radiation in Previously Untreated Patients With Stage IV NSCLC	2023	RECRUITING		NO	IV	ADULT, OLDER_ADULT	Hospital	OTHER	North America	INTERVENTIONAL	PHASE2	＜50	Single	TREATMENT	NA	SINGLE_GROUP	None (Open Label)	1	Pembrolizumab		1																			1
NCT05906329	Low-dose Radiotherapy Combined With Conventional Fractionated Radiotherapy in Lung Cancer After Immunotherapy Resistance	2022	RECRUITING		NO	IV	ADULT, OLDER_ADULT	Hospital	OTHER	Asia	INTERVENTIONAL	NA	＜50	Single	TREATMENT	NA	SINGLE_GROUP	None (Open Label)	0	ICI		1																			1
NCT05657873	A Study of Targeted Radiation Therapy in People With Non-Small Cell Lung Cancer (NSCLC)	2022	RECRUITING		NO	IV	ADULT, OLDER_ADULT	Hospital	OTHER	North America	INTERVENTIONAL	PHASE2	≥50,<100	Multi	TREATMENT	RANDOMIZED	PARALLEL	None (Open Label)	0	ICI	1	1					1		1									1
NCT05522660	Immunotherapy or Targeted Therapy With or Without Stereotactic Radiosurgery for Patients With Brain Metastases From Melanoma or Non-small Cell Lung Cancer	2022	RECRUITING		NO	IV, Brain Metastasis	ADULT, OLDER_ADULT	Foundation	OTHER	Europe	INTERVENTIONAL	PHASE3	≥100,<200	Multi	TREATMENT	RANDOMIZED	PARALLEL	None (Open Label)	1	ICI	1	1					1		1											1
NCT05784142	Chemo-immunotherapy Induction Followed by Hypo-radiotherapy in LA-NSCLC(CHIC)	2022	ACTIVE_NOT_RECRUITING		NO	II-III	ADULT, OLDER_ADULT	Hospital	OTHER	Asia	INTERVENTIONAL	PHASE2	≥50,<100	Single	TREATMENT	NA	SINGLE_GROUP	None (Open Label)	0	ICI		1																1
NCT05488626	Daily Adaptive Radiation Therapy: An Individualized Approach for Stage III Lung Cancer	2022	ACTIVE_NOT_RECRUITING		NO	III	ADULT, OLDER_ADULT	Company	INDUSTRY	North America	INTERVENTIONAL	NA	≥200,<500	Multi	TREATMENT	RANDOMIZED	PARALLEL	None (Open Label)	0	ICI			1																							1
NCT04929041	Testing the Addition of Radiation Therapy to Immunotherapy for Stage IV Non-Small Cell Lung Cancer Patients Who Are PD-L1 Negative	2022	RECRUITING		NO	III-IV	ADULT, OLDER_ADULT	Research Institutions	NIH	North America	INTERVENTIONAL	PHASE2|PHASE3	≥200,<500	Multi	TREATMENT	RANDOMIZED	PARALLEL	None (Open Label)	0	Nivolumab, Ipilimumab	1	1							1									1
NCT05557552	Sequential Chemo-immunotherapy Plus Thoracic Radiotherapy for Elderly and/or Frail Stage III Non-small-cell Lung Cancer	2022	RECRUITING		NO	III	ADULT, OLDER_ADULT	Hospital	OTHER	Asia	INTERVENTIONAL	NA	≥50,<100	Single	TREATMENT	RANDOMIZED	PARALLEL	None (Open Label)	0	ICI		1			1	1															1
NCT05229614	Immunotherapy and Carbon Ion Radiotherapy In Solid Cancers With Stable Disease	2022	RECRUITING		NO	IV	ADULT, OLDER_ADULT	Hospital	OTHER	Europe	INTERVENTIONAL	PHASE2	＜50	Multi	TREATMENT	NA	SINGLE_GROUP	None (Open Label)	0	Pembrolizumab	1	1											1					1
NCT05319574	SBRT Followed by Neoadjuvant Immunochemotherapy in Resectable Stage II to III Non-small Cell Lung Cancer	2022	ACTIVE_NOT_RECRUITING		NO	II-III	ADULT, OLDER_ADULT	University	OTHER	Asia	INTERVENTIONAL	PHASE2	＜50	Single	TREATMENT	NA	SINGLE_GROUP	None (Open Label)	0	Tislelizumab	1	1							1									1
NCT05481775	Evaluating Efficacy and Safety of Anlotinib Combined With Concurrent Chemoradiotherapy Followed by Consolidation Immunotherapy for Locally Advanced Non-small Cell Lung Cancer	2022	WITHDRAWN	Clincal decision based on previous results	NO	III	ADULT, OLDER_ADULT	University	OTHER	Asia	INTERVENTIONAL	PHASE2	＜50	Single	TREATMENT	RANDOMIZED	PARALLEL	None (Open Label)	0	Tislelizumab	1	1								1								1
NCT04992780	Comparing Hypo-fractionated Intensity- Modulated Radiation Therapy to Standard- Fractionated IMRT Along With Chemotherapy and Immunotherapy for Non-Small Cell Lung Cancer	2022	RECRUITING		NO	III	ADULT, OLDER_ADULT	University	OTHER	North America	INTERVENTIONAL	PHASE2	≥50,<100	Multi	TREATMENT	RANDOMIZED	PARALLEL	None (Open Label)	1	Durvalumab		1																1
NCT05468242	Study of Tislelizumab for Locally Advanced Non-Small Cell Lung Cancer Following Neoadjuvant Chemotherapy Plus Tislelizumab ± Bevacizumab and Definitive Concurrent Chemoradiation Therapy	2022	RECRUITING		NO	III	ADULT, OLDER_ADULT	University	OTHER	Asia	INTERVENTIONAL	PHASE2	≥100,<200	Single	TREATMENT	NON_RANDOMIZED	PARALLEL	None (Open Label)	1	Tislelizumab		1																1
NCT05584267	Immune Treatment of Brain Metastasis of Lung Cancer Combined With Large-segmentation Precision Radiotherapy	2021	RECRUITING		NO	IV, Brain Metastasis	ADULT, OLDER_ADULT	Hospital	OTHER	Asia	INTERVENTIONAL	NA	≥100,<200	Multi	TREATMENT	RANDOMIZED	PARALLEL	None (Open Label)	0	ICI	1	1		1			1		1					1				1
NCT05472467	Camrelizumab Combination With SBRT and Concurrent Chemotherapy Treated Stage IV Oligometastatic Non-small Cell Lung Cancer	2021	RECRUITING		NO	IV, Oligometastatic	ADULT, OLDER_ADULT	Hospital	OTHER	Asia	INTERVENTIONAL	PHASE2	＜50	Single	TREATMENT	NA	SINGLE_GROUP	None (Open Label)	1	Camrelizumab	1	1					1		1									1
NCT04372927	ADMIRAL Trial: Adaptive Mediastinal Radiation With Chemo-Immunotherapy	2021	TERMINATED	Terminated due to slow accrual	YES	III	ADULT, OLDER_ADULT	University	OTHER	North America	INTERVENTIONAL	PHASE2	＜50	Single	TREATMENT	NA	SINGLE_GROUP	None (Open Label)	1	Durvalumab		1	1		1			1										1										1
NCT05000710	Concomitant Radiotherapy, Tremelimumab & Durvalumab for Advanced NSCLC Patients Progressing on First-line Immunotherapy	2021	RECRUITING		NO	III-IV	CHILD, ADULT, OLDER_ADULT	Hospital	INDUSTRY	Asia	INTERVENTIONAL	PHASE2	＜50	Multi	TREATMENT	NA	SINGLE_GROUP	None (Open Label)	0	Tremelimumab, Durvalumab		1																			1
NCT04597671	Durvalumab and Low-dose PCI vs Durvalumab and Observation in Radically Treated Patients With Stage III NSCLC (NVALT28)	2021	RECRUITING		NO	III	ADULT, OLDER_ADULT	Oncology Cooperation Organization	OTHER	Europe	INTERVENTIONAL	PHASE3	≥100,<200	Multi	PREVENTION	RANDOMIZED	PARALLEL	None (Open Label)	1	Durvalumab		1																			1
NCT05128630	Chemo-immunotherapy, Hypo-fractionated RT and Maintenance Immunotherapy for Stage III NSCLC.	2021	RECRUITING		NO	III	ADULT, OLDER_ADULT	Hospital	OTHER	Europe	INTERVENTIONAL	PHASE2	＜50	Multi	TREATMENT	NA	SINGLE_GROUP	None (Open Label)	0	Durvalumab		1																1
NCT04765709	Durvalumab and Chemotherapy Induction Followed by Durvalumab and Radiotherapy in Large Volume Stage III NSCLC	2021	ACTIVE_NOT_RECRUITING		NO	III	ADULT, OLDER_ADULT	Research Institutions	OTHER	Europe	INTERVENTIONAL	PHASE2	＜50	Multi	TREATMENT	NA	SINGLE_GROUP	None (Open Label)	1	Durvalumab						1		1
NCT04989283	Testing the Addition of an Immunotherapy Drug, Atezolizumab, to the Usual Chemotherapy Treatment During Radiation Therapy for Superior Sulcus Non-small Cell Lung Cancer	2021	WITHDRAWN	Due to no accrual	NO	II-III	ADULT, OLDER_ADULT	Research Institutions	NIH	North America	INTERVENTIONAL	PHASE2	＜50	Multi	TREATMENT	RANDOMIZED	PARALLEL	None (Open Label)	0	Atezolizumab						1
NCT04786093	Durvalumab and Stereotactic Radiotherapy for Advanced NSCLC	2021	RECRUITING		NO	IV	ADULT, OLDER_ADULT	University	OTHER	North America	INTERVENTIONAL	PHASE2	≥50,<100	Single	TREATMENT	RANDOMIZED	PARALLEL	None (Open Label)	1	Durvalumab	1	1							1									1
NCT04776447	Atezolizumab Plus Induction Chemotherapy Plus CT-radiotherapy. (APOLO)	2021	RECRUITING		NO	III-IV	ADULT, OLDER_ADULT	Foundation	OTHER	Europe	INTERVENTIONAL	PHASE2	≥50,<100	Multi	TREATMENT	NA	SINGLE_GROUP	None (Open Label)	1	Atezolizumab
NCT04951063	Fraction Dose Escalation of Hypo-fractionated Radiotherapy in LANSCLC	2021	COMPLETED		NO	III	ADULT, OLDER_ADULT	University	OTHER	Asia	INTERVENTIONAL	PHASE1	＜50	Single	TREATMENT	NA	SINGLE_GROUP	None (Open Label)	0	ICI		1																1
NCT04577638	Accelerated Radio-Immunotherapy for Lung Cancer	2021	COMPLETED		NO	III	ADULT, OLDER_ADULT	Hospital	OTHER	Europe	INTERVENTIONAL	PHASE2	＜50	Multi	TREATMENT	NA	SINGLE_GROUP	None (Open Label)	0	Nivolumab
NCT04230408	Intensified Chemo-immuno-radiotherapy With Durvalumab for Stage III Non-Small Cell Lung Cancers	2021	ACTIVE_NOT_RECRUITING		NO	III	ADULT, OLDER_ADULT	Oncology Cooperation Organization	OTHER	South America	INTERVENTIONAL	PHASE2	＜50	Multi	TREATMENT	NA	SINGLE_GROUP	None (Open Label)	0	Durvalumab
NCT05031533	Dose-painting Radiation for LA-NSCLC	2021	RECRUITING		NO	II-III	ADULT, OLDER_ADULT	Hospital	OTHER	Asia	INTERVENTIONAL	NA	＜50	Multi	TREATMENT	NA	SINGLE_GROUP	None (Open Label)	1	ICI		1	1					1															1				1
NCT04549428	Atezolizumab Plus 8 Gy Single-fraction Radiotherapy for Advanced Oligoprogressive NSCLC	2020	ACTIVE_NOT_RECRUITING		NO	IV, Oligoprogressive	ADULT, OLDER_ADULT	Hospital	OTHER	Europe	INTERVENTIONAL	PHASE2	＜50	Multi	TREATMENT	NA	SINGLE_GROUP	None (Open Label)	0	Atezolizumab	1	1					1		1											1
NCT04245514	Multimodality Treatment in Stage III Non-small Cell Lung Cancer (NSCLC)	2020	RECRUITING		NO	III	ADULT, OLDER_ADULT	Oncology Cooperation Organization	OTHER	Europe	INTERVENTIONAL	PHASE2	≥50,<100	Multi	TREATMENT	NA	SINGLE_GROUP	None (Open Label)	1	Durvalumab		1																1
NCT04212052	Split-course Hypofractionated Radiotherapy With Concurrent Chemotherapy in Locally Advanced Non-small Cell Lung Cancer	2020	COMPLETED		NO	III	ADULT, OLDER_ADULT	University	OTHER	Asia	INTERVENTIONAL	PHASE2	≥100,<200	Single	TREATMENT	NA	SINGLE_GROUP	None (Open Label)	1	ICI		1																1
NCT04202809	Phase-II Trial of Induction Chemotherapy and Chemoradiotherapy Plus/Minus Durvalumab and Consolidation Immunotherapy in Patients With Resectable Stage III NSCLC.	2020	RECRUITING		NO	III	ADULT, OLDER_ADULT	Hospital	OTHER	Europe	INTERVENTIONAL	PHASE2	≥50,<100	Multi	TREATMENT	RANDOMIZED	PARALLEL	None (Open Label)	0	Durvalumab
NCT04153734	Pembrolizumab + Platinum Doublets Without Radiation for Programmed Death-ligand 1 (PD-L1) ≥50% Locally Advanced NSCLC	2019	UNKNOWN		NO	III	CHILD, ADULT, OLDER_ADULT	Hospital	OTHER	Asia	INTERVENTIONAL	PHASE2	＜50	Multi	TREATMENT	NA	SINGLE_GROUP	None (Open Label)	1	Pembrolizumab					1
NCT03965468	Immunotherapy, Chemotherapy, Radiotherapy and Surgery for Synchronous Oligo-metastatic NSCLC	2019	RECRUITING		NO	IV, Oligometastatic	ADULT, OLDER_ADULT	Foundation	INDUSTRY	Europe	INTERVENTIONAL	PHASE2	≥50,<100	Multi	TREATMENT	NA	SINGLE_GROUP	None (Open Label)	1	Durvalumab, Tremelimuma	1	1					1		1									1
NCT04151940	PET/CT Changes During Chemoimmunotherapy and Radiation Therapy in Patients With Stage IV Non-small Cell Lung Cancer	2019	RECRUITING		NO	IV	ADULT, OLDER_ADULT	University	OTHER	North America	INTERVENTIONAL	NA	≥50,<100	Single	OTHER	NA	SINGLE_GROUP	None (Open Label)	0	ICI				1													1
NCT03818776	Proton Based Cardiac Sparing Accelerated Fractionated RadioTherapy in Unresectable NSCLC	2019	TERMINATED	Safety	NO	II-III	ADULT, OLDER_ADULT	Hospital	OTHER	North America	INTERVENTIONAL	EARLY_PHASE1	＜50	Single	TREATMENT	NON_RANDOMIZED	SEQUENTIAL	None (Open Label)	1	Durvalumab	1	1										1						1
NCT03871153	Chemoradiation Plus Durvalumab Followed by Surgery Followed by Adjuvant Durvalumab in Patients With Surgically Resectable Stage III (N2) Non-Small Cell Lung Cancer	2019	TERMINATED	Investigator decided to halt study due to low accrual.	YES	III	ADULT, OLDER_ADULT	University	OTHER	North America	INTERVENTIONAL	PHASE2	＜50	Multi	TREATMENT	NA	SEQUENTIAL	None (Open Label)	1	Durvalumab
NCT03867175	Immunotherapy With or Without SBRT in Patients With Stage IV Non-small Cell Lung Cancer	2019	ACTIVE_NOT_RECRUITING		NO	IV	ADULT, OLDER_ADULT	University	OTHER	North America	INTERVENTIONAL	PHASE3	＜50	Single	TREATMENT	RANDOMIZED	PARALLEL	None (Open Label)	1	Pembrolizumab	1	1							1									1
NCT03916419	Magnetic Resonance-Guided Hypofractionated Adaptive Radiation Therapy With Concurrent Chemotherapy and Consolidation Durvalumab for Inoperable Stage IIB, IIIA, and Select IIIB and IIIC Non-small Cell Lung Cancer	2019	ACTIVE_NOT_RECRUITING		NO	II-III	ADULT, OLDER_ADULT	University	OTHER	North America	INTERVENTIONAL	PHASE2	＜50	Single	TREATMENT	NON_RANDOMIZED	SEQUENTIAL	None (Open Label)	1	Durvalumab	1	1								1								1
NCT03774732	PD-1 Inhibitor and Chemotherapy With Concurrent Irradiation at Varied Tumour Sites in Advanced Non-small Cell Lung Cancer	2019	RECRUITING		NO	IV	ADULT, OLDER_ADULT	Oncology Cooperation Organization	OTHER	Europe	INTERVENTIONAL	PHASE3	≥200,<500	Multi	TREATMENT	RANDOMIZED	PARALLEL	None (Open Label)	1	Pembrolizumab	1	1					1		1									1
NCT03812549	Safety and Tolerability Evaluation of Sintilimab in Combination With Radiation in Stage IV NSCLC Patients	2019	COMPLETED		NO	IV	ADULT, OLDER_ADULT	University	OTHER	Asia	INTERVENTIONAL	PHASE1	＜50	Multi	TREATMENT	NA	SINGLE_GROUP	None (Open Label)	1	Sintilimab	1	1			1				1									1			1
NCT03808337	Investigating the Effectiveness of Stereotactic Body Radiotherapy (SBRT) in Addition to Standard of Care Treatment for Cancer That Has Spread Beyond the Original Site of Disease	2019	RECRUITING		NO	IV, Oligometastatic	ADULT, OLDER_ADULT	Hospital	OTHER	North America	INTERVENTIONAL	PHASE2	≥100,<200	Multi	TREATMENT	RANDOMIZED	PARALLEL	None (Open Label)	0	ICI	1	1					1		1									1
NCT04287894	Assess the Safety of Immunotherapy Induction With Tremelimumab and Durvalumab Prior to Chemoradiotherapy and/or Resection in the Treatment	2018	UNKNOWN		NO	III	ADULT, OLDER_ADULT	Research Institutions	OTHER	Europe	INTERVENTIONAL	PHASE1	＜50	Single	TREATMENT	NON_RANDOMIZED	SINGLE_GROUP	None (Open Label)	0	Tremelimumab, Durvalumab
NCT03523702	The Selective Personalized Radio-Immunotherapy for Locally Advanced NSCLC Trial.	2018	ACTIVE_NOT_RECRUITING		NO	II-III	ADULT, OLDER_ADULT	University	OTHER	North America	INTERVENTIONAL	PHASE2	＜50	Single	TREATMENT	NON_RANDOMIZED	PARALLEL	None (Open Label)	1	pembrolizumab		1	1		1																		1				1
NCT03509012	Immunotherapy in Combination With Chemoradiation in Patients With Advanced Solid Tumors	2018	ACTIVE_NOT_RECRUITING		NO	IV	ADULT, OLDER_ADULT	Company	INDUSTRY	North America	INTERVENTIONAL	PHASE1	≥100,<200	Multi	TREATMENT	NON_RANDOMIZED	PARALLEL	None (Open Label)	0	Durvalumab, Tremelimumab
NCT03446911	Combining SBRT and Immunotherapy in Early Stage NSCLC Patients Planned for Surgery	2018	UNKNOWN		NO	I	ADULT, OLDER_ADULT	Hospital	OTHER	Europe	INTERVENTIONAL	PHASE1|PHASE2	＜50	Single	TREATMENT	RANDOMIZED	PARALLEL	None (Open Label)	0	Pembrolizumab	1	1							1									1
NCT03275597	Phase Ib Study of Stereotactic Body Radiotherapy (SBRT) in Oligometastatic Non-small Lung Cancer (NSCLC) With Dual Immune Checkpoint Inhibition	2018	TERMINATED	slow accrual	NO	IV, Oligometastatic	ADULT, OLDER_ADULT	University	OTHER	North America	INTERVENTIONAL	PHASE1	＜50	Single	TREATMENT	NA	SINGLE_GROUP	None (Open Label)	0	Durvalumab, Tremelimumab	1	1					1		1									1
NCT03383302	SBRT With Immunotherapy in Early Stage Non-small Cell Lung Cancer: Tolerability and Lung Effects	2018	ACTIVE_NOT_RECRUITING		NO	I-II	ADULT, OLDER_ADULT	Foundation	OTHER	Europe	INTERVENTIONAL	PHASE1|PHASE2	＜50	Multi	TREATMENT	NA	SINGLE_GROUP	None (Open Label)	1	Nivolumab	1	1							1									1
NCT03337698	A Study Of Multiple Immunotherapy-Based Treatment Combinations In Participants With Metastatic Non-Small Cell Lung Cancer (Morpheus- Non-Small Cell Lung Cancer)	2018	RECRUITING		NO	IV	ADULT, OLDER_ADULT	Company	INDUSTRY	North America	INTERVENTIONAL	PHASE1|PHASE2	≥500	Multi	TREATMENT	RANDOMIZED	PARALLEL	None (Open Label)	1	Atezolizumab
NCT03391869	Nivolumab and Ipilimumab With or Without Local Consolidation Therapy in Treating Patients With Stage IV Non-Small Cell Lung Cancer	2017	RECRUITING		NO	IV	ADULT, OLDER_ADULT	Hospital	OTHER	North America	INTERVENTIONAL	PHASE3	≥200,<500	Multi	TREATMENT	RANDOMIZED	PARALLEL	None (Open Label)	1	Nivolumab and Ipilimumab
NCT03446547	Ablative STEreotactic RadiOtherapy wIth Durvalumab (MEDI4736)	2017	RECRUITING		NO	I	ADULT, OLDER_ADULT	Hospital	INDUSTRY	Europe	INTERVENTIONAL	PHASE2	≥100,<200	Multi	TREATMENT	RANDOMIZED	PARALLEL	None (Open Label)	1	Durvalumab	1	1							1									1
NCT03311672	美国科学家在2017年就在用PET考虑指导放免联合，但这个研究没有病人纳入?T-Cell PET Imaging With [18F]F-AraG in Lung Cancer	2017	WITHDRAWN	Low Accrual	NO	I-III	ADULT, OLDER_ADULT	University	OTHER	North America	INTERVENTIONAL	PHASE2	＜50	Single	DIAGNOSTIC	NON_RANDOMIZED	PARALLEL	None (Open Label)	0	Pembrolizumab	1	1		1					1					1				1
NCT03102242	Atezolizumab Immunotherapy in Patients With Advanced NSCLC	2017	COMPLETED		YES	III	ADULT, OLDER_ADULT	Research Institutions	OTHER	North America	INTERVENTIONAL	PHASE2	≥50,<100	Multi	TREATMENT	NA	SINGLE_GROUP	None (Open Label)	1	Atezolizumab			1		1																							1
NCT03050554	Stereotactic Body Radiation Therapy (SBRT) Combined With Avelumab (Anti-PD-L1) for Management of Early Stage Non-Small Cell Lung Cancer (NSCLC)	2017	TERMINATED	Funding	NO	I	ADULT, OLDER_ADULT	University	OTHER	North America	INTERVENTIONAL	PHASE1|PHASE2	＜50	Multi	TREATMENT	NA	SINGLE_GROUP	None (Open Label)	1	Avelumab	1	1							1									1
NCT03168464	Radiation and Immune Checkpoints Blockade in Metastatic NSCLC (BMS # CA209-632)	2017	TERMINATED	Slow accrual	YES	IV	ADULT, OLDER_ADULT	University	OTHER	North America	INTERVENTIONAL	PHASE1|PHASE2	＜50	Single	TREATMENT	NA	SINGLE_GROUP	None (Open Label)	1	Ipilimumab, Nivolumab	1	1							1									1
NCT03223155	Concurrent or Sequential Immunotherapy and Radiation Therapy in Patients With Metastatic Lung Cancer	2017	ACTIVE_NOT_RECRUITING		NO	IV	ADULT, OLDER_ADULT	University	OTHER	North America	INTERVENTIONAL	PHASE1	≥50,<100	Single	TREATMENT	RANDOMIZED	PARALLEL	None (Open Label)	0	Ipilimumab, Nivolumab	1	1							1									1
NCT03176173	Radical-Dose Image Guided Radiation Therapy in Treating Patients With Metastatic Non-small Cell Lung Cancer Undergoing Immunotherapy	2017	ACTIVE_NOT_RECRUITING		NO	IV	ADULT, OLDER_ADULT	University	OTHER	North America	INTERVENTIONAL	NA	＜50	Single	TREATMENT	NON_RANDOMIZED	PARALLEL	None (Open Label)	1	ICI	1									1
NCT03141359	Use of High Dose Radiation Followed by Chemotherapy and Radiation to Treat Locally Advanced NSCLC	2017	ACTIVE_NOT_RECRUITING		NO	II-III	ADULT, OLDER_ADULT	University	OTHER	North America	INTERVENTIONAL	PHASE2	≥50,<100	Single	TREATMENT	NA	SINGLE_GROUP	None (Open Label)	1	Durvalumab	1	1						1	1									1
NCT03825510	Immunotherapy SBRT Sensitization of the Programmed Death-1 (PD-1) Effect	2017	COMPLETED		NO	IV	ADULT, OLDER_ADULT	Hospital	OTHER	North America	INTERVENTIONAL	PHASE2	＜50	Single	TREATMENT	NA	SINGLE_GROUP	None (Open Label)	1	ICI	1	1							1									1
NCT03035890	Hypofractionated Radiation Therapy to Improve Immunotherapy Response in Non-Small Cell Lung Cancer	2017	COMPLETED		NO	IV	ADULT, OLDER_ADULT	University	OTHER	North America	INTERVENTIONAL	NA	＜50	Single	TREATMENT	NA	SINGLE_GROUP	None (Open Label)	1	Nivolumab, Pembrolizumab, Atezolizumab		1																1
NCT06207292	Stereotactic Ablative Radiotherapy in Synchronous and Metachronous Oligo-Metastatic Non Small Cell Lung Cancer	2016	RECRUITING		NO	IV, Oligometastatic	ADULT, OLDER_ADULT	Hospital	OTHER	Europe	INTERVENTIONAL	NA	≥100,<200	Single	TREATMENT	NA	SINGLE_GROUP	None (Open Label)	0	ICI	1	1					1		1									1
NCT02492867	（通过放疗中期PET-CT评估对放疗剂量优化）A Pilot Study of Response-Driven Adaptive Radiation Therapy for Patients With Locally Advanced Non-Small Cell Lung Cancer	2016	COMPLETED		NO	II-III	ADULT, OLDER_ADULT	University	OTHER	North America	INTERVENTIONAL	NA	＜50	Multi	TREATMENT	NA	SINGLE_GROUP	None (Open Label)	1	Durvalumab			1	1											1											1
NCT02221739	Study of Combined Ionizing Radiation and Ipilimumab in Metastatic Non-small Cell Lung Cancer (NSCLC)	2014	COMPLETED		YES	IV	ADULT, OLDER_ADULT	Hospital	OTHER	North America	INTERVENTIONAL	PHASE1|PHASE2	＜50	Multi	TREATMENT	NA	SINGLE_GROUP	None (Open Label)	1	Ipilimumab
NCT06219317	Immunotherapy Consolidation After Radical Treatment of Synchronous Oligo-metastatic NSCLC	2024	NOT_YET_RECRUITING		NO	IV, Oligometastatic	ADULT, OLDER_ADULT	Oncology Cooperation Organization	NETWORK	Europe	INTERVENTIONAL	PHASE2	≥100,<200	Multi	TREATMENT	RANDOMIZED	PARALLEL	TRIPLE (PARTICIPANT, CARE_PROVIDER, INVESTIGATOR)	1	Cemiplimab							1
NCT06434740	A Study of SBRT Combined With Puterizumab in Intrapulmonary Metastasis From NSCLC	2024	NOT_YET_RECRUITING		NO	IV	ADULT, OLDER_ADULT	Hospital	OTHER	Asia	INTERVENTIONAL	PHASE2	＜50	Single	TREATMENT	NA	SINGLE_GROUP	None (Open Label)	0	Puterizumab	1	1					1		1									1
NCT05840770	Cemiplimab for the Treatment of Untreated Brain Metastases From PD-L1 >= 50% Non-Small Cell Lung Cancer	2024	RECRUITING		NO	IV, Brain Metastasis	ADULT, OLDER_ADULT	Hospital	OTHER	North America	INTERVENTIONAL	PHASE2	＜50	Single	TREATMENT	NA	SINGLE_GROUP	None (Open Label)	1	Cemiplimab	1	1			1		1		1											1
NCT06448910	The Efficacy and Safety of Cadonilimab (AK104) as Induction and Consolidation Therapy for Locally Advanced/Unresectable NSCLC Patients Receiving Concurrent Chemoradiotherapy	2024	NOT_YET_RECRUITING		NO	III	ADULT, OLDER_ADULT	University	OTHER	Asia	INTERVENTIONAL	PHASE2	＜50	Single	TREATMENT	NA	SINGLE_GROUP	None (Open Label)	0	Cadonilimab (AK104)						1
NCT06424899	A Study Comparing Neoadjuvant Chemoimmunotherapy and Immuno-consolidationafter Compared With Immunoconsolidation After Radical Chemoradiotherapy for Stage III Potentially Resectable NSCLC	2024	RECRUITING		NO	III	ADULT, OLDER_ADULT	Hospital	OTHER	Asia	INTERVENTIONAL	PHASE2	≥50,<100	Multi	TREATMENT	RANDOMIZED	PARALLEL	SINGLE (PARTICIPANT)	0	Adebrelimab
NCT06331455	Treatment of Pulmonary SUlcus, Pancoast and Chest Wall Non-small Cell Lung Cancer Employing Radiation, Immuno-oncology and Resection	2024	NOT_YET_RECRUITING		NO	II-III	ADULT, OLDER_ADULT	Hospital	OTHER	North America	INTERVENTIONAL	PHASE2	＜50	Multi	TREATMENT	NA	SINGLE_GROUP	None (Open Label)	1	Durvalumab		1																1
NCT06379087	Radiation Therapy Followed by Tislelizumab and Anlotinib Aeoadjuvant/Adjuvant Therapy for Stage II-IIIA NSCLC	2024	NOT_YET_RECRUITING		NO	II-III	ADULT, OLDER_ADULT	Hospital	OTHER	Asia	INTERVENTIONAL	PHASE2	＜50	Single	TREATMENT	NA	SINGLE_GROUP	None (Open Label)	0	Tislelizumab	1	1							1									1
NCT06391008	Immunosensitized Radiotherapy Combined With Evoximab (AK112) and Chemotherapy Neoadjuvant Therapy for Stage II-III Non-small Cell Lung Cancer	2024	NOT_YET_RECRUITING		NO	II-III	ADULT, OLDER_ADULT	Hospital	OTHER	Asia	INTERVENTIONAL	PHASE2	＜50	Single	TREATMENT	NA	SINGLE_GROUP	None (Open Label)	0	Evoximab	1	1							1									1
NCT06431685	Safety and Efficacy of Whole Brain LDRT+ICI+Intrathecal Chemotherapy in Refractory Meningeal Metastasis of Lung Cancer	2024	RECRUITING		NO	IV, Leptomeningeal Metastasis	ADULT, OLDER_ADULT	University	OTHER	Asia	INTERVENTIONAL	PHASE1	＜50	Single	TREATMENT	NA	SINGLE_GROUP	None (Open Label)	0	Sintilimab		1					1														1
NCT06293690	Toripalimab Combined With SBRT for NSCLC	2024	NOT_YET_RECRUITING		NO	II-III	ADULT, OLDER_ADULT	Hospital	OTHER	Asia	INTERVENTIONAL	PHASE2	＜50	Single	TREATMENT	RANDOMIZED	PARALLEL	None (Open Label)	0	Toripalimab	1	1							1									1
NCT06102057	PACCELIO - FDG-PET Based Small Volume Accelerated Immuno Chemoradiotherapy in Locally Advanced NSCLC	2024	ACTIVE_NOT_RECRUITING		NO	III	ADULT, OLDER_ADULT	Oncology Cooperation Organization	OTHER	Europe	INTERVENTIONAL	PHASE2	≥100,<200	Multi	TREATMENT	RANDOMIZED	PARALLEL	None (Open Label)	1	Durvalumab	1		1	1						1						1											1
NCT06154967	To Explore the Effect of Immune-induced Stereotactic Body Radiotherapy (SBRT) on Reversing Immunoresistance in Stage IIIc/IV Non-small Cell Lung Cancer (NSCLC)	2024	NOT_YET_RECRUITING		NO	III-IV	ADULT, OLDER_ADULT	Hospital	OTHER	Asia	INTERVENTIONAL	NA	＜50	Single	TREATMENT	NA	SINGLE_GROUP	None (Open Label)	0	Tislelizumab	1	1							1									1
NCT05451173	Combining ICI With SBRT or HypoFrx-RT for ES NSCLC	2023	NOT_YET_RECRUITING		NO	I-III	ADULT, OLDER_ADULT	Hospital	OTHER	Asia	INTERVENTIONAL	PHASE1|PHASE2	≥50,<100	Single	TREATMENT	NON_RANDOMIZED	PARALLEL	None (Open Label)	1	Durvalumab	1	1							1									1
NCT06003075	Induction Chemo-Nivo in Unresectable Stage III NSCLC	2023	RECRUITING		NO	III	ADULT, OLDER_ADULT	University	OTHER	North America	INTERVENTIONAL	PHASE2	＜50	Single	TREATMENT	NON_RANDOMIZED	SEQUENTIAL	None (Open Label)	1	Nivolumab						1
NCT04944173	SCION: SABR and Checkpoint Inhibition Of NSCLC	2023	RECRUITING		NO	I	ADULT, OLDER_ADULT	University	OTHER	Europe	INTERVENTIONAL	PHASE2	≥50,<100	Single	TREATMENT	RANDOMIZED	PARALLEL	None (Open Label)	1	Durvalumab	1	1							1									1
NCT05696782	Quick Start Durvalumab Following Chemoradiation for Stage III Nonsmall Cell Lung Cancer	2023	RECRUITING		NO	III	ADULT, OLDER_ADULT	University	OTHER	North America	INTERVENTIONAL	PHASE2	＜50	Single	TREATMENT	NA	SINGLE_GROUP	None (Open Label)	1	Durvalumab
NCT05766800	Induction Therapy With PD-1 Antibody Combined With Platinum-based Doublet Chemotherapy for Locally-advanced Non-small Cell Lung Cancer	2023	RECRUITING		NO	III	ADULT, OLDER_ADULT	Hospital	OTHER	Asia	INTERVENTIONAL	PHASE2	≥100,<200	Single	TREATMENT	RANDOMIZED	PARALLEL	None (Open Label)	0	Serplulimab
NCT05798845	The Effect of Toripalimab Plus Radiotherapy in Patients With Operable Stage II-IIIA (N+) Non Small Cell Lung Cancer	2023	RECRUITING		NO	II-III	ADULT, OLDER_ADULT	Hospital	OTHER	Asia	INTERVENTIONAL	PHASE2	≥100,<200	Single	TREATMENT	RANDOMIZED	PARALLEL	None (Open Label)	1	Toripalimab	1	1				1		1	1									1			1
NCT05500092	An Open Label, Randomized Study of Neoadjuvant Nivolumab and Chemotherapy, With or Without Sub-ablative Stereotactic Body Radiation Therapy, for Resectable Stage IIA to IIIB Non-small Cell Lung Cancer	2023	RECRUITING		NO	II-III	ADULT, OLDER_ADULT	Hospital	OTHER	North America	INTERVENTIONAL	PHASE2	≥50,<100	Single	TREATMENT	RANDOMIZED	PARALLEL	None (Open Label)	1	Nivolumab	1	1							1									1
NCT05401786	Anti-PD-1 Re-challenge After Immune Priming by Ipilimumab and Immune Boosting by Radiotherapy in Advanced NSCLC	2023	RECRUITING		NO	IV	ADULT, OLDER_ADULT	Research Institutions	OTHER	Europe	INTERVENTIONAL	PHASE2	≥50,<100	Single	TREATMENT	NA	SINGLE_GROUP	None (Open Label)	1	Ipilimumab, Cemiplimab	1	1					1		1									1
NCT06065813	Neoadjuvant Triprizumab and Radiotherapy in Operable Patients With Stage IIA-IIIA Non-small Cell Lung Cancer	2022	RECRUITING		NO	II-III	ADULT, OLDER_ADULT	Hospital	OTHER	Asia	INTERVENTIONAL	PHASE2	＜50	Single	TREATMENT	NA	SINGLE_GROUP	None (Open Label)	0	Toripalimab
NCT05440916	Palliative RadIotherapy of Multiple Metastatic Sites Before First Line of Systemic Therapy With Immune Checkpoint Inhibitors and Chemotherapy in Metastatic Non-Small-Cell Lung Cancer	2022	RECRUITING		NO	IV	ADULT, OLDER_ADULT	Hospital	OTHER	Europe	INTERVENTIONAL	PHASE2	≥50,<100	Single	TREATMENT	NON_RANDOMIZED	SEQUENTIAL	None (Open Label)	0	ICI		1	1		1		1											1											1
NCT05758116	Tislelizumab Consolidation Therapy After Radiotherapy or Sequential Chemoradiation in Locally Advanced NSCLC Patients	2022	RECRUITING		NO	III	ADULT, OLDER_ADULT	Hospital	OTHER	Asia	INTERVENTIONAL	PHASE2	＜50	Single	TREATMENT	NA	SINGLE_GROUP	None (Open Label)	0	Tislelizumab
NCT05430009	Liver SBRT in Combination With Immune Checkpoint Inhibition in Patients With Metastatic Non-small Cell Lung Cancer	2022	RECRUITING		NO	IV	ADULT, OLDER_ADULT	Hospital	FED	North America	INTERVENTIONAL	PHASE1	＜50	Single	TREATMENT	NA	SINGLE_GROUP	None (Open Label)	1	Pembrolizumab	1	1					1		1									1
NCT05387044	SBRT for Oligoprogressive NSCLC After First Line Treatment With Immune Checkpoint Inhibitors	2022	UNKNOWN		NO	IV, Oligoprogressive	ADULT, OLDER_ADULT	Hospital	OTHER	Asia	INTERVENTIONAL	PHASE2	＜50	Single	TREATMENT	NA	SINGLE_GROUP	None (Open Label)	0	ICI	1	1					1		1									1
NCT04878107	SBRT/LDRT in Combination With Camrelizumab and Apatinib in Metastatic Non-small Cell Lung Cancer Patient Previously Treated With PD-1/L1 Inhibitor and Chemotherapy	2022	UNKNOWN		NO	IV	ADULT, OLDER_ADULT	University	OTHER	Asia	INTERVENTIONAL	PHASE2	≥50,<100	Single	TREATMENT	RANDOMIZED	SEQUENTIAL	None (Open Label)	0	Camrelizumab	1	1							1									1			1
NCT05348668	Hybrid Dose-fraction Radiotherapy for Metastatic Non-small Cell Lung Cancer	2022	RECRUITING		NO	IV	ADULT, OLDER_ADULT	Hospital	OTHER_GOV	Asia	INTERVENTIONAL	PHASE2	≥50,<100	Multi	TREATMENT	NA	SINGLE_GROUP	None (Open Label)	0	ICI		1																				1
NCT05269485	Hypofraction Radiotherapy for Locally Advanced Non-small Cell Lung Cancer	2022	RECRUITING		NO	III	ADULT, OLDER_ADULT	Hospital	OTHER_GOV	Asia	INTERVENTIONAL	PHASE1|PHASE2	＜50	Single	TREATMENT	RANDOMIZED	PARALLEL	SINGLE (INVESTIGATOR)	0	ICI		1																1			1
NCT05111197	Local Ablative Stereotactic Radiotherapy for Residual Hypermetabolic Lesion in Patients With Locally Advanced or Metastatic Non-small Cell Lung Cancer Long-term Responders to Immunotherapy	2022	RECRUITING		NO	III-IV, Oligometastatic, Oligoresidual	ADULT, OLDER_ADULT	Research Institutions	OTHER	Europe	INTERVENTIONAL	PHASE3	≥100,<200	Multi	TREATMENT	RANDOMIZED	PARALLEL	None (Open Label)	0	ICI	1	1	1				1		1									1										1	1
NCT05222087	PRIME_LUNG: Primary Radiotherapy In MEtastatic Lung Cancer - A Pilot Study	2022	RECRUITING		NO	IV	ADULT, OLDER_ADULT	Hospital	OTHER	Oceania	INTERVENTIONAL	PHASE1	＜50	Single	TREATMENT	RANDOMIZED	PARALLEL	None (Open Label)	1	ICI	1	1				1			1									1
NCT05615142	Safety and Tolerability of Low Dose Radiotherapy Concurrent SBRT and PD-1 Inhibitors in Advanced NSCLC.	2021	RECRUITING		NO	IV	ADULT, OLDER_ADULT	University	OTHER	Asia	INTERVENTIONAL	PHASE1	＜50	Single	TREATMENT	NA	SINGLE_GROUP	None (Open Label)	0	ICI	1	1							1									1			1
NCT04933903	BrUOG 397: NEO Rad (LOW): Neoadjuvant Low Dose Stereotactic Body Radiotherapy, Ipilimumab and Nivolumab	2021	RECRUITING		NO	I-III	ADULT, OLDER_ADULT	University	OTHER	North America	INTERVENTIONAL	PHASE2	＜50	Single	TREATMENT	NA	SINGLE_GROUP	None (Open Label)	1	Ipilimumab, Nivolumab	1	1				1		1	1									1			1
NCT04585490	Personalized Escalation of Consolidation Treatment Following Chemoradiotherapy and Immunotherapy in Stage III NSCLC in Stage III NSCLC	2021	RECRUITING		NO	III	ADULT, OLDER_ADULT	University	OTHER	North America	INTERVENTIONAL	PHASE3	＜50	Single	TREATMENT	NON_RANDOMIZED	PARALLEL	None (Open Label)	1	Durvalumab, Tremelimumab
NCT04748419	Safety & Efficacy of Consolidative Hypofractionated Radiation Therapy for Boosting Residual Lung Cancer With Durvalumab	2021	RECRUITING		NO	III	ADULT, OLDER_ADULT	University	OTHER	North America	INTERVENTIONAL	PHASE1|PHASE2	＜50	Single	TREATMENT	NA	SINGLE_GROUP	None (Open Label)	1	Durvalumab		1	1			1												1										1
NCT04892953	Local Consolidative Therapy and Durvalumab for Oligoprogressive and Polyprogressive Stage III NSCLC After Chemoradiation and Anti-PD-L1 Therapy	2021	RECRUITING		NO	III, Oligoprogressive	ADULT, OLDER_ADULT	Hospital	OTHER	North America	INTERVENTIONAL	PHASE2	＜50	Single	TREATMENT	NON_RANDOMIZED	SINGLE_GROUP	None (Open Label)	0	Durvalumab							1
NCT05157542	Neoadjuvant LDRT Combined With Durvalumab in Potentially Resectable Stage III NSCLC	2021	UNKNOWN		NO	III	ADULT, OLDER_ADULT	Hospital	OTHER	Asia	INTERVENTIONAL	PHASE1	＜50	Single	TREATMENT	NA	SINGLE_GROUP	None (Open Label)	1	Durvalumab		1																			1
NCT03955198	A Trial Evaluating Stereotactic Radiotherapy Plus Durvalumab Continuation for Patients With NSCLC Metachronous Oligometastatic Disease Under Durvalumab Consolidation Following Chemoradiation	2021	ACTIVE_NOT_RECRUITING		NO	III, Oligometastatic	ADULT, OLDER_ADULT	Research Institutions	OTHER	Europe	INTERVENTIONAL	PHASE2	＜50	Multi	TREATMENT	NA	SINGLE_GROUP	None (Open Label)	0	Durvalumab	1	1					1		1									1
NCT04062708	CHIO3 Trial: CHemotherapy Combined With Immune Checkpoint Inhibitor for Operable Stage IIIA/B Non-Small Cell Lung Cancer	2021	ACTIVE_NOT_RECRUITING		NO	III	ADULT, OLDER_ADULT	Research Institutions	OTHER	North America	INTERVENTIONAL	PHASE2	＜50	Multi	TREATMENT	NA	SINGLE_GROUP	None (Open Label)	1	Durvalumab
NCT04768075	Camrelizumab Combined With SRT/WBRT and Chemotherapy in Patients With Brain Metastases of Driven Gene-negative NSCLC	2021	UNKNOWN		NO	IV, Brain Metastasis	ADULT, OLDER_ADULT	Oncology Cooperation Organization	OTHER	Asia	INTERVENTIONAL	PHASE3	≥200,<500	Multi	TREATMENT	RANDOMIZED	PARALLEL	QUADRUPLE (PARTICIPANT, CARE_PROVIDER, INVESTIGATOR, OUTCOMES_ASSESSOR)	0	Camrelizumab	1	1					1		1									1
NCT05267392	Neoadjuvant Immunotherapy With Durvalumab (MEDI4736) in Non-Surgical Early Stage or Locally Advanced Non-Small Cell Lung Cancer (NSCLC) Followed by Radical Radiotherapy or Chemoradiotherapy	2021	UNKNOWN		NO	I-III	ADULT, OLDER_ADULT	Hospital	OTHER	Europe	INTERVENTIONAL	PHASE1|PHASE2	＜50	Single	TREATMENT	NA	SINGLE_GROUP	None (Open Label)	0	Durvalumab
NCT04751747	Adaptive Radiation Planning for the Reduction of Radiation-Induced Toxicity in Patients With Stage II-IV Non-small Cell Lung Cancer	2021	RECRUITING		NO	II-IV	ADULT, OLDER_ADULT	Hospital	OTHER	North America	INTERVENTIONAL	NA	＜50	Single	SUPPORTIVE_CARE	NA	SINGLE_GROUP	None (Open Label)	1	ICI			1																							1
NCT04716946	Treating Early-stage Non-Small Cell Lung Cancer With Durvalumab and Radiation Therapy	2021	RECRUITING		NO	I-III	ADULT, OLDER_ADULT	Hospital	OTHER	North America	INTERVENTIONAL	PHASE2	＜50	Single	TREATMENT	NA	SINGLE_GROUP	None (Open Label)	0	Durvalumab	1	1							1									1
NCT04982549	A Study to Evaluate the Safety of Concurrent Durvalumab With CRT Followed by Durvalumab for Chinese Unresectable Stage III NSCLC	2021	UNKNOWN		NO	III	ADULT, OLDER_ADULT	Hospital	OTHER	Asia	INTERVENTIONAL	PHASE2	＜50	Multi	TREATMENT	NA	SINGLE_GROUP	None (Open Label)	0	Durvalumab
NCT04310020	Study of Radiation Therapy Followed by Atezolizumab in Stage II or III Non-small Cell Lung Cancer Patients	2021	RECRUITING		NO	II-III	ADULT, OLDER_ADULT	Research Institutions	NIH	North America	INTERVENTIONAL	PHASE2	＜50	Multi	TREATMENT	NA	SINGLE_GROUP	None (Open Label)	0	Atezolizumab		1																	1
NCT04767009	SBRT for Oligo-residual NSCLC After Treatment With PD-1/PD-L1 Immune Checkpoint Inhibitors	2021	RECRUITING		NO	IV, Oligoresidual	ADULT, OLDER_ADULT	University	OTHER	Asia	INTERVENTIONAL	PHASE2	≥50,<100	Multi	TREATMENT	NA	SINGLE_GROUP	None (Open Label)	0	ICI	1	1	1				1		1									1										1
NCT04654520	A Randomized Study of Primary Tumor Radiotherapy for Patients With Stage Ⅳ NSCLC	2020	UNKNOWN		NO	IV	ADULT, OLDER_ADULT	University	OTHER	Asia	INTERVENTIONAL	NA	≥200,<500	Single	TREATMENT	RANDOMIZED	PARALLEL	None (Open Label)	0	ICI			1			1																		1
NCT04613284	Rh-Endostatin Combined With CCRT(50 Gy) Followed by Durvalumab Maintenance for the Treatment of Specific Phase III NSCLC	2020	UNKNOWN		NO	III	ADULT, OLDER_ADULT	Hospital	OTHER	Asia	INTERVENTIONAL	PHASE4	≥50,<100	Multi	TREATMENT	NA	SINGLE_GROUP	None (Open Label)	0	Durvalumab		1				1															1
NCT04249362	Study of Durvalumab Following Radiation Therapy in Patients With Stage 3 Unresectable NSCLC Ineligible for Chemotherapy	2020	COMPLETED		NO	III	ADULT, OLDER_ADULT	Company	INDUSTRY	North America	INTERVENTIONAL	PHASE2	≥100,<200	Multi	TREATMENT	NON_RANDOMIZED	SINGLE_GROUP	None (Open Label)	0	Durvalumab		1																1
NCT04434560	Neoadjuvant Immunotherapy in Brain Metastases	2020	TERMINATED	Poor enrollment	YES	IV, Brain Metastasis	ADULT, OLDER_ADULT	University	OTHER	North America	INTERVENTIONAL	PHASE2	＜50	Single	TREATMENT	RANDOMIZED	SINGLE_GROUP	None (Open Label)	0	Nivolumab, Ipilimumab	1	1					1		1											1
NCT04485026	Local Consolidative Radiotherapy for Oligoprogressive in Non-small Cell Lung Carcinoma	2020	WITHDRAWN	No enrollments, low patient population as well as a dramatic change in the insurance approval processes for oligoprogressive state with eviCore saying they do not support SBRT in this setting at all.	NO	IV, Oligometastatic	ADULT, OLDER_ADULT	University	OTHER	North America	INTERVENTIONAL	PHASE2	＜50	Single	TREATMENT	RANDOMIZED	PARALLEL	None (Open Label)	1	ICI							1
NCT04517526	Efficacy and Safety of Platinum-based Chemotherapy + Bevacizumab + Durvalumab, and Salvage SBRT for IV Non-Small Cell Lung Cancer Patients With EGFR Mutations After Failure of First Line Osimertinib: A Multicenter, Prospective, Phase II Clinical Study	2020	UNKNOWN		NO	IV	ADULT, OLDER_ADULT	Hospital	OTHER	Asia	INTERVENTIONAL	PHASE2	≥50,<100	Multi	TREATMENT	NA	SINGLE_GROUP	None (Open Label)	0	Durvalumab	1	1							1									1
NCT04255836	Durvalumab Combined With Chemotherapy and Stereotactic Body Radiotherapy (SBRT) in Patients With Oligometastatic Non-small Cell Lung Cancer (NSCLC)	2020	UNKNOWN		NO	IV, Oligometastatic	ADULT, OLDER_ADULT	Hospital	OTHER	Asia	INTERVENTIONAL	PHASE2	＜50	Multi	TREATMENT	NA	SINGLE_GROUP	None (Open Label)	0	Durvalumab	1	1					1		1									1
NCT04465968	Efficacy and Safety of CRT, Durvalumab and Surgery for SST	2020	NOT_YET_RECRUITING		NO	II-III	ADULT, OLDER_ADULT	Hospital	OTHER	Asia	INTERVENTIONAL	PHASE3	≥50,<100	Single	TREATMENT	NA	SINGLE_GROUP	None (Open Label)	1	Durvalumab						1
NCT04214262	Testing the Addition of the Drug Atezolizumab to the Usual Radiation Treatment for Patients With Early Non-small Cell Lung Cancer	2020	RECRUITING		NO	I-II	ADULT, OLDER_ADULT	Research Institutions	NIH	North America	INTERVENTIONAL	PHASE3	≥200,<500	Multi	TREATMENT	RANDOMIZED	PARALLEL	None (Open Label)	0	Atezolizumab	1	1							1									1
NCT04203511	INCMGA00012 in Combination With Chemoradiation in Participants With Stage III Non-Small Cell Lung Cancer (POD1UM-301)	2020	WITHDRAWN	Sponsor Strategic/Business Decision	NO	III	ADULT, OLDER_ADULT	Company	INDUSTRY	North America	INTERVENTIONAL	PHASE3	＜50	Single	TREATMENT	RANDOMIZED	PARALLEL	DOUBLE (PARTICIPANT, INVESTIGATOR)	1	Retifanlimab
NCT04364048	Durvalumab Followed by Chemoradiation and Consolidation Durvalumab for Stage III Non-small Cell Lung Cancer	2020	ACTIVE_NOT_RECRUITING		NO	III	ADULT, OLDER_ADULT	Research Institutions	OTHER	North America	INTERVENTIONAL	PHASE2	＜50	Multi	TREATMENT	NA	SINGLE_GROUP	None (Open Label)	1	Durvalumab
NCT04351256	Thoracic Radiotherapy Plus Durvalumab in Elderly and/or Frail NSCLC Stage III Patients Unfit for Chemotherapy	2020	RECRUITING		NO	III	ADULT, OLDER_ADULT	Research Institutions	OTHER	Europe	INTERVENTIONAL	PHASE2	≥50,<100	Multi	TREATMENT	RANDOMIZED	PARALLEL	None (Open Label)	1	Durvalumab		1			1	1												1
NCT04092283	Testing the Addition of an Antibody to Standard Chemoradiation Followed by the Antibody for One Year to Standard Chemoradiation Followed by One Year of the Antibody in Patients With Unresectable Stage III Non-Small Cell Lung Cancer	2020	ACTIVE_NOT_RECRUITING		NO	III-IV	ADULT, OLDER_ADULT	Research Institutions	NIH	North America	INTERVENTIONAL	PHASE3	≥500	Multi	TREATMENT	RANDOMIZED	PARALLEL	None (Open Label)	0	Durvalumab
NCT04003246	Phase II Concurrent Durvalumab and Radiotherapy for for Stage III Non-Small Cell Lung Cancer	2020	ACTIVE_NOT_RECRUITING		NO	III	ADULT, OLDER_ADULT	Hospital	OTHER	North America	INTERVENTIONAL	PHASE2	≥50,<100	Single	TREATMENT	NA	SINGLE_GROUP	None (Open Label)	1	Durvalumab						1
NCT04306926	A Study of TQB2450 Injection Combined With Stereotactic Body Radiation Therapy (SBRT) in Subjects With Advanced Oligometastatic Non-Small Cell Lung Cancer	2020	UNKNOWN		NO	IV, Oligometastatic	ADULT, OLDER_ADULT	Company	INDUSTRY	Asia	INTERVENTIONAL	PHASE2	≥50,<100	Multi	TREATMENT	NA	SINGLE_GROUP	None (Open Label)	0	Benmelstobart (TQB2450)	1	1					1		1									1
NCT04271384	Stereotactic Ablative Radiotherapy With Nivolumab for Early-Stage Operable Non-Small Cell Lung Cancer	2020	COMPLETED		NO	I	ADULT, OLDER_ADULT	Hospital	OTHER	Europe	INTERVENTIONAL	PHASE2	＜50	Single	TREATMENT	NA	SINGLE_GROUP	None (Open Label)	0	Nivolumab	1	1							1									1
NCT04513301	Efficacy and Safety of Sintilimab With or Without Radiotherapy in Patients With Recurrent or IV NSCLC (EGFR -, ALK -) After Failure of Platinum-based Chemotherapy: A Randomized,Open Labled, Phase II Clinical Study	2020	UNKNOWN		NO	IV	ADULT, OLDER_ADULT	Hospital	OTHER	Asia	INTERVENTIONAL	PHASE2	≥50,<100	Single	TREATMENT	RANDOMIZED	PARALLEL	None (Open Label)	0	Sintilimab
NCT04085250	Study of Nivolumab for Non-Small Cell Lung Cancer (Stage III) Following Neoadjuvant Chemotherapy Plus Nivolumab and Definitive Concurrent Chemoradiation Therapy	2019	ACTIVE_NOT_RECRUITING		NO	III	ADULT, OLDER_ADULT	University	OTHER	Asia	INTERVENTIONAL	PHASE2	≥200,<500	Multi	TREATMENT	RANDOMIZED	PARALLEL	None (Open Label)	1	Nivolumab
NCT04180501	SRS Sequential Sindilimab in Brain Metastasis of NSLSC	2019	UNKNOWN		NO	IV, Brain Metastasis	ADULT, OLDER_ADULT	Hospital	OTHER	Asia	INTERVENTIONAL	PHASE2	＜50	Single	TREATMENT	NA	SINGLE_GROUP	None (Open Label)	0	Sintilimab	1	1					1		1											1
NCT03827577	OMEGA, Local Ablative Therapy in Oligometastatic NSCLC	2019	UNKNOWN		NO	IV, Oligometastatic	ADULT, OLDER_ADULT	Hospital	OTHER	Europe	INTERVENTIONAL	PHASE3	≥100,<200	Single	TREATMENT	RANDOMIZED	PARALLEL	None (Open Label)	0	ICI						1	1
NCT04013542	Ipilimumab and Nivolumab in Combination With Radiation Therapy in Treating Patients With Stage 2-3 Non-small Lung Cancer	2019	ACTIVE_NOT_RECRUITING		NO	II-III	ADULT, OLDER_ADULT	Hospital	OTHER	North America	INTERVENTIONAL	PHASE1	＜50	Single	TREATMENT	NA	SINGLE_GROUP	None (Open Label)	0	Ipilimumab, Nivolumab
NCT03999710	Determining Whether Durvalumab in Combination With Radiation Therapy Can Prevent the Progression of Non-Small Cell Lung Cancer	2019	ACTIVE_NOT_RECRUITING		NO	II-III	ADULT, OLDER_ADULT	Hospital	OTHER	North America	INTERVENTIONAL	PHASE2	≥50,<100	Multi	TREATMENT	NA	SINGLE_GROUP	None (Open Label)	0	Durvalumab
NCT03924869	Efficacy and Safety Study of Stereotactic Body Radiotherapy (SBRT) With or Without Pembrolizumab (MK-3475) in Adults With Unresected Stage I or II Non-Small Cell Lung Cancer (NSCLC) (MK-3475-867/KEYNOTE-867)	2019	ACTIVE_NOT_RECRUITING		NO	I-II	ADULT, OLDER_ADULT	Company	INDUSTRY	North America	INTERVENTIONAL	PHASE3	≥200,<500	Multi	TREATMENT	RANDOMIZED	PARALLEL	DOUBLE (PARTICIPANT, INVESTIGATOR)	1	Pembrolizumab	1	1							1									1
NCT03945227	Clinical Trial for Evaluating Efficacy and Safety of PDR001 in Concurrent Plus Consolidation Versus Consolidation Only in Addition to Standard Chemoradiotherapy in Unresectable Stage III NSCLC Patients (PASTURE)	2019	WITHDRAWN	Due to the delay in the study shceduled, due to the start of competitive study and the approval of Durvalumab from the Ministry of Food and Drug Safety, it was judged that it was difficult to enroll subjects.	NO	III	ADULT, OLDER_ADULT	University	OTHER	Asia	INTERVENTIONAL	PHASE2	＜50	Single	TREATMENT	RANDOMIZED	SINGLE_GROUP	None (Open Label)	0	Spartalizumab (PDR001)
NCT03745222	A Study of Tislelizumab (BGB-A317) Plus Chemoradiotherapy Followed by Tislelizumab Monotherapy in Newly Diagnosed, Stage III Subjects With Locally Advanced, Unresectable Non-small Cell Lung Cancer	2019	TERMINATED	BeiGene and Celgene Corporation terminated the parties' global collaboration for the compound, pending the acquisition of Celgene by Bristol Myers Squibb	YES	III	ADULT, OLDER_ADULT	Company	INDUSTRY	North America	INTERVENTIONAL	PHASE3	＜50	Multi	TREATMENT	RANDOMIZED	PARALLEL	QUADRUPLE (PARTICIPANT, CARE_PROVIDER, INVESTIGATOR, OUTCOMES_ASSESSOR)	1	Tislelizumab
NCT03589547	Durvalumab and Consolidation SBRT Following Chemoradiation for Locally Advanced Stage III Non-Small Cell Lung	2019	ACTIVE_NOT_RECRUITING		NO	III	ADULT, OLDER_ADULT	University	OTHER	North America	INTERVENTIONAL	PHASE2	＜50	Single	TREATMENT	NA	SINGLE_GROUP	None (Open Label)	1	Durvalumab	1	1							1									1
NCT03693300	A Study to Determine Safety of Durvalumab After Sequential Chemo Radiation in Patients With Unresectable Stage III Non-Small Cell Lung Cancer	2019	COMPLETED		YES	III	ADULT, OLDER_ADULT	Company	INDUSTRY	North America	INTERVENTIONAL	PHASE2	≥100,<200	Multi	TREATMENT	NON_RANDOMIZED	SINGLE_GROUP	None (Open Label)	1	Durvalumab
NCT04167657	SinTilimab After Radiation (STAR Study)	2019	UNKNOWN		NO	IV	ADULT, OLDER_ADULT	Hospital	OTHER	Asia	INTERVENTIONAL	PHASE2	＜50	Single	TREATMENT	NA	SINGLE_GROUP	None (Open Label)	0	Sintilimab		1																1
NCT03833154	Durvalumab vs Placebo With Stereotactic Body Radiation Therapy in Early Stage Unresected Non-small Cell Lung Cancer (NSCLC) Patients / Osimertinib Following SBRT in Patients With Early Stage Unresected NSCLC Harboring an EGFR Mutation	2019	RECRUITING		NO	I-II	ADULT, OLDER_ADULT	Company	INDUSTRY	North America	INTERVENTIONAL	PHASE3	≥500	Multi	TREATMENT	RANDOMIZED	PARALLEL	QUADRUPLE (PARTICIPANT, CARE_PROVIDER, INVESTIGATOR, OUTCOMES_ASSESSOR)	1	Durvalumab	1	1							1									1
NCT03574220	Pembrolizumab After Lung SBRT for Medically Inoperable Early Stage Non-small Cell Lung Cancer	2019	WITHDRAWN	No accrual - closed by PRMC	NO	I-II	ADULT, OLDER_ADULT	Hospital	OTHER	North America	INTERVENTIONAL	EARLY_PHASE1	＜50	Single	TREATMENT	NA	SINGLE_GROUP	None (Open Label)	1	Pembrolizumab	1	1				1			1									1
NCT03694236	Concurrent Neoadjuvant Chemoradiotherapy Plus Durvalumab (MEDI4736) in Resectable Stage III NSCLC	2019	RECRUITING		NO	III	ADULT, OLDER_ADULT	University	OTHER	Asia	INTERVENTIONAL	PHASE1|PHASE2	＜50	Single	TREATMENT	NA	SINGLE_GROUP	None (Open Label)	0	Durvalumab
NCT03663166	Radiation and Chemotherapy With Ipilimumab Followed by Nivolumab for Patients With Stage III Unresectable Non-Small Cell Lung Cancer (NSCLC)	2018	TERMINATED	Increased SAE occurrence per PI	YES	III	ADULT, OLDER_ADULT	Hospital	OTHER	North America	INTERVENTIONAL	PHASE1|PHASE2	＜50	Multi	TREATMENT	NON_RANDOMIZED	SEQUENTIAL	None (Open Label)	1	Ipilimumab, Nivolumab						1
NCT03631784	A Trial of Pembrolizumab in Combination With Chemotherapy and Radiotherapy in Stage III NSCLC (KEYNOTE-799, MK-3475-799)	2018	COMPLETED		YES	III	ADULT, OLDER_ADULT	Company	INDUSTRY	North America	INTERVENTIONAL	PHASE2	≥200,<500	Multi	TREATMENT	RANDOMIZED	PARALLEL	DOUBLE (PARTICIPANT, INVESTIGATOR)	1	Pembrolizumab						1
NCT03644823	Combinatory ImmunoTherapy-1 (Com-IT-1) Irradiation and PD-1 Blockade in Locally Advanced / Advanced NSCLC	2018	TERMINATED	slow recruiting	NO	III-IV	ADULT, OLDER_ADULT	Hospital	OTHER	Europe	INTERVENTIONAL	PHASE2	＜50	Single	TREATMENT	NA	SINGLE_GROUP	None (Open Label)	0	Atezolizumab	1	1							1									1			1
NCT03557411	A Trial of SHR-1210 (an Anti-PD-1 Inhibitor) in Combination With Hypofraction Radiotherapy in Patients With NSCLC	2018	UNKNOWN		NO	IV, Oligometastatic	ADULT, OLDER_ADULT	Hospital	OTHER	Asia	INTERVENTIONAL	PHASE2	＜50	Single	TREATMENT	NA	SINGLE_GROUP	None (Open Label)	0	Camrelizumab		1					1											1
NCT03509584	Phase I Multicenter Trial Combining Nivolumab, Ipilimumab and Hypo-fractionated Radiotherapy for Pretreated Advanced Stage Non-small Cell Lung Cancer Patients	2018	TERMINATED	SAFETY	NO	IV	ADULT, OLDER_ADULT	Hospital	OTHER	Europe	INTERVENTIONAL	PHASE1	＜50	Multi	TREATMENT	RANDOMIZED	PARALLEL	None (Open Label)	1	Nivolumab, Ipilimumab
NCT02599454	Atezolizumab and Stereotactic Body Radiation Therapy in Treating Patients With Non-small Cell Lung Cancer	2018	ACTIVE_NOT_RECRUITING		NO	I	ADULT, OLDER_ADULT	University	OTHER	North America	INTERVENTIONAL	PHASE1	＜50	Multi	TREATMENT	NA	SINGLE_GROUP	None (Open Label)	1	Atezolizumab	1	1							1									1
NCT03519971	Study of Durvalumab Given With Chemoradiation Therapy in Patients With Unresectable Non-small Cell Lung Cancer	2018	ACTIVE_NOT_RECRUITING		NO	III	ADULT, OLDER_ADULT	Company	INDUSTRY	North America	INTERVENTIONAL	PHASE3	≥200,<500	Multi	TREATMENT	RANDOMIZED	PARALLEL	DOUBLE (PARTICIPANT, CARE_PROVIDER)	1	Durvalumab
NCT03511391	CHEckpoint Inhibition in Combination With an Immunoboost of External Beam Radiotherapy in Solid Tumors	2018	COMPLETED		NO	IV	ADULT, OLDER_ADULT	Hospital	OTHER	Europe	INTERVENTIONAL	PHASE2	≥50,<100	Multi	TREATMENT	RANDOMIZED	PARALLEL	None (Open Label)	0	Nivolumab or Pembrolizumab or Atezolizumab	1	1							1									1
NCT03436056	PembRolIzuMab and Stereotactic Body Radiotherapy In Metastatic Non-small-cell lunG Cancer Patients	2018	TERMINATED	funding pulled	NO	IV	ADULT, OLDER_ADULT	Hospital	OTHER	Europe	INTERVENTIONAL	PHASE1	＜50	Single	TREATMENT	NON_RANDOMIZED	SEQUENTIAL	None (Open Label)	1	Pembrolizumab	1	1				1			1														1
NCT03379441	Pembrolizumab (MK-3475) as Maintainance in Treated Patients With Unresectable Stage III NSCLC	2018	UNKNOWN		NO	III	ADULT, OLDER_ADULT	University	OTHER	Europe	INTERVENTIONAL	PHASE2	≥100,<200	Multi	TREATMENT	RANDOMIZED	PARALLEL	DOUBLE (PARTICIPANT, INVESTIGATOR)	0	Pembrolizumab
NCT03237377	Neoadjuvant Immunoradiation for Resectable Non-Small Cell Lung Cancer	2017	ACTIVE_NOT_RECRUITING		YES	III	ADULT, OLDER_ADULT	Hospital	OTHER	North America	INTERVENTIONAL	PHASE2	＜50	Multi	TREATMENT	NON_RANDOMIZED	SEQUENTIAL	None (Open Label)	1	Durvalumab, Tremelimumab						1
NCT03307759	Sequencing of Stereotactic Ablative Body Radiotherapy in Combination With PD-1 Blockade Using Pembrolizumab in Metastatic Non-Small Cell Lung Carcinoma	2017	COMPLETED		NO	IV	ADULT, OLDER_ADULT	Hospital	OTHER	Oceania	INTERVENTIONAL	PHASE1	＜50	Multi	TREATMENT	RANDOMIZED	PARALLEL	None (Open Label)	1	Pembrolizumab	1	1							1									1
NCT03087760	Trial of Consolidation Pembrolizumab After Concurrent Chemotherapy and Proton Reirradiation for Thoracic Recurrences of Non-Small Cell Lung Cancer	2017	COMPLETED		YES	IV	ADULT, OLDER_ADULT	Hospital	OTHER	North America	INTERVENTIONAL	PHASE2	＜50	Single	TREATMENT	NA	SINGLE_GROUP	None (Open Label)	1	Pembrolizumab	1	1				1						1						1
NCT03313804	Priming Immunotherapy in Advanced Disease With Radiation	2017	ACTIVE_NOT_RECRUITING		NO	IV	ADULT, OLDER_ADULT	Hospital	OTHER	North America	INTERVENTIONAL	PHASE2	≥50,<100	Single	TREATMENT	NA	SINGLE_GROUP	None (Open Label)	0	Nivolumab, Atezolizumab or Pembrolizumab	1	1							1									1
NCT03148327	Astra Zeneca (Immuno Stereotactic Ablative Body Radiotherapy) ISABR Study: Randomized Phase I/II Study of Stereotactic Body Radiotherapy	2017	ACTIVE_NOT_RECRUITING		NO	I-II	ADULT, OLDER_ADULT	Hospital	OTHER	North America	INTERVENTIONAL	PHASE1|PHASE2	＜50	Multi	TREATMENT	RANDOMIZED	PARALLEL	None (Open Label)	1	Durvalumab	1	1							1									1
NCT03217071	Pembrolizumab With and Without Radiotherapy for Non-Small Cell Lung Cancer	2017	COMPLETED		NO	I-III	ADULT, OLDER_ADULT	University	OTHER	North America	INTERVENTIONAL	PHASE2	＜50	Single	TREATMENT	RANDOMIZED	SEQUENTIAL	None (Open Label)	1	Pembrolizumab	1	1				1			1									1
NCT02888743	Durvalumab and Tremelimumab With or Without High or Low-Dose Radiation Therapy in Treating Patients With Metastatic Colorectal or Non-small Cell Lung Cancer	2017	ACTIVE_NOT_RECRUITING		NO	IV	ADULT, OLDER_ADULT	Research Institutions	NIH	North America	INTERVENTIONAL	PHASE2	≥100,<200	Multi	TREATMENT	RANDOMIZED	PARALLEL	None (Open Label)	1	Durvalumab, Tremelimumab		1																1			1
NCT03245177	Pembrolizumab in Combination With Radiotherapy in Locally Advanced Non-Small Cell Lung Cancer (NSCLC)	2017	WITHDRAWN	Funding withdrawn.	NO	III-IV	ADULT, OLDER_ADULT	Hospital	OTHER	Europe	INTERVENTIONAL	PHASE1	＜50	Single	TREATMENT	NA	SINGLE_GROUP	None (Open Label)	1	Pembrolizumab						1
NCT03110978	Stereotactic Body Radiation Therapy With or Without Nivolumab in Treating Patients With Stage I-IIA or Recurrent Non-small Cell Lung Cancer	2017	ACTIVE_NOT_RECRUITING		NO	I-II	ADULT, OLDER_ADULT	Hospital	OTHER	North America	INTERVENTIONAL	PHASE2	≥100,<200	Multi	TREATMENT	RANDOMIZED	PARALLEL	None (Open Label)	1	Nivolumab	1	1							1									1
NCT02658097	Pembrolizumab Alone or Sequentially Following Single Fraction Non-ablative Radiation to One of the Target Lesions, in Previously Treated Patients With Stage IV NSCLC	2017	COMPLETED		YES	IV	ADULT, OLDER_ADULT	Hospital	OTHER	North America	INTERVENTIONAL	PHASE2	＜50	Single	TREATMENT	NA	SINGLE_GROUP	None (Open Label)	1	Pembrolizumab	1	1							1									1
NCT02978404	Combining Radiosurgery and Nivolumab in the Treatment of Brain Metastases	2017	ACTIVE_NOT_RECRUITING		NO	IV, Brain Metastasis	ADULT, OLDER_ADULT	Hospital	OTHER	North America	INTERVENTIONAL	PHASE2	＜50	Multi	TREATMENT	NA	SINGLE_GROUP	None (Open Label)	1	Nivolumab	1	1					1		1											1
NCT02987998	Neoadjuvant Chemoradiation Plus Pembrolizumab Followed By Consolidation Pembrolizumab in NSCLC	2017	TERMINATED	higher than expected rate of toxicity & unrealistic timeline to complete trial under company's proposed plan to reopen	NO	III	ADULT, OLDER_ADULT	Hospital	OTHER	North America	INTERVENTIONAL	PHASE1	＜50	Single	TREATMENT	NA	SINGLE_GROUP	None (Open Label)	1	Pembrolizumab
NCT03158883	UCDCC#270: Avelumab and Stereotactic Ablative Radiotherapy in Non-responding and Progressing NSCLC Patients	2017	COMPLETED		NO	IV	ADULT, OLDER_ADULT	University	OTHER	North America	INTERVENTIONAL	EARLY_PHASE1	＜50	Single	TREATMENT	NON_RANDOMIZED	PARALLEL	None (Open Label)	1	Avelumab	1	1							1									1
NCT03044626	Fostering Efficacy of Anti - PD-1 - Treatment: Nivolumab Plus Radiotherapy in Advanced NSCLC	2017	COMPLETED		NO	IV	ADULT, OLDER_ADULT	Company	OTHER	Europe	INTERVENTIONAL	PHASE2	≥100,<200	Multi	TREATMENT	NON_RANDOMIZED	PARALLEL	None (Open Label)	0	Nivolumab		1																1
NCT02696993	Nivolumab and Radiation Therapy With or Without Ipilimumab in Treating Patients With Brain Metastases From Non-small Cell Lung Cancer	2016	ACTIVE_NOT_RECRUITING		NO	IV, Brain Metastasis	ADULT, OLDER_ADULT	Hospital	OTHER	North America	INTERVENTIONAL	PHASE1|PHASE2	≥50,<100	Single	TREATMENT	NON_RANDOMIZED	PARALLEL	None (Open Label)	0	Ipilimumab, Nivolumab	1	1					1		1									1
NCT02904954	Durvalumab (MEDI4736) With or Without SBRT in Clinical Stage I, II and IIIA Non-small Cell Lung Cancer	2016	COMPLETED		YES	I-III	ADULT, OLDER_ADULT	University	OTHER	North America	INTERVENTIONAL	PHASE2	≥50,<100	Single	TREATMENT	RANDOMIZED	PARALLEL	None (Open Label)	1	Durvalumab	1	1							1									1
NCT02768558	Cisplatin and Etoposide Plus Radiation Followed By Nivolumab/Placebo For Locally Advanced NSCLC	2016	TERMINATED	Another treatment found efficacious	YES	III	ADULT, OLDER_ADULT	Foundation	OTHER	North America	INTERVENTIONAL	PHASE3	＜50	Multi	TREATMENT	RANDOMIZED	PARALLEL	QUADRUPLE (PARTICIPANT, CARE_PROVIDER, INVESTIGATOR, OUTCOMES_ASSESSOR)	1	Nivolumab						1
NCT02858869	Pembrolizumab and Stereotactic Radiosurgery for Melanoma or Non-Small Cell Lung Cancer Brain Metastases	2016	COMPLETED		NO	IV, Brain Metastasis	ADULT, OLDER_ADULT	University	OTHER	North America	INTERVENTIONAL	PHASE1	＜50	Single	TREATMENT	NON_RANDOMIZED	PARALLEL	None (Open Label)	1	Pembrolizumab	1	1					1		1											1
NCT02621398	Pembrolizumab, Paclitaxel, Carboplatin, and Radiation Therapy in Treating Patients With Stage II-IIIB Non-Small Cell Lung Cancer	2016	ACTIVE_NOT_RECRUITING		YES	II-III	ADULT, OLDER_ADULT	University	OTHER	North America	INTERVENTIONAL	PHASE1	＜50	Multi	TREATMENT	NA	SINGLE_GROUP	None (Open Label)	1	Pembrolizumab
NCT02525757	MPDL3280A With Chemoradiation for Lung Cancer	2016	ACTIVE_NOT_RECRUITING		NO	III-IV	ADULT, OLDER_ADULT	Hospital	OTHER	North America	INTERVENTIONAL	PHASE2	≥50,<100	Single	TREATMENT	NON_RANDOMIZED	CROSSOVER	None (Open Label)	0	Atezolizumab
NCT02639026	Trial Of Hypofractionated Radiotherapy In Combination With MEDI4736 And Tremelimumab For Patients With Metastatic Melanoma And Lung, Breast And Pancreatic Cancers	2016	COMPLETED		NO	IV	ADULT, OLDER_ADULT	Hospital	OTHER	North America	INTERVENTIONAL	PHASE1	≥50,<100	Single	TREATMENT	NON_RANDOMIZED	PARALLEL	None (Open Label)	1	Durvalumab, Tremelimumab		1																1
NCT02400814	MPDL3280A and Stereotactic Ablative Radiotherapy in Patients With Non-small Cell Lung Cancer	2015	TERMINATED	Enrollment halted due to slow accrual.	NO	IV	ADULT, OLDER_ADULT	University	OTHER	North America	INTERVENTIONAL	PHASE1	＜50	Single	TREATMENT	NON_RANDOMIZED	PARALLEL	None (Open Label)	1	Atezolizumab	1	1							1									1
NCT02434081	NIvolumab COmbination With Standard First-line Chemotherapy and Radiotherapy in Locally Advanced Stage IIIA/B Non-Small Cell Lung Carcinoma	2015	COMPLETED		YES	III	ADULT, OLDER_ADULT	Foundation	NETWORK	Europe	INTERVENTIONAL	PHASE2	≥50,<100	Multi	TREATMENT	NA	SINGLE_GROUP	None (Open Label)	1	Nivolumab
NCT02463994	A Pilot Study of MPDL3280A and HIGRT in Metastatic NSCLC	2015	COMPLETED		NO	IV	ADULT, OLDER_ADULT	Hospital	OTHER	North America	INTERVENTIONAL	EARLY_PHASE1	＜50	Multi	TREATMENT	NA	SINGLE_GROUP	None (Open Label)	1	Atezolizumab		1																1
NCT02444741	Pembrolizumab and Stereotactic Body Radiation Therapy or Non-Stereotactic Wide-Field Radiation Therapy in Treating Patients With Non-small Cell Lung Cancer	2015	ACTIVE_NOT_RECRUITING		NO	IV	ADULT, OLDER_ADULT	Hospital	OTHER	North America	INTERVENTIONAL	PHASE1|PHASE2	≥100,<200	Single	TREATMENT	RANDOMIZED	PARALLEL	None (Open Label)	0	Pembrolizumab	1	1	1						1			1						1											1
NCT02492568	Pembrolizumab After SBRT Versus Pembrolizumab Alone in Advanced NSCLC	2015	COMPLETED		NO	IV	ADULT, OLDER_ADULT	Research Institutions	OTHER	Europe	INTERVENTIONAL	PHASE2	≥50,<100	Single	TREATMENT	RANDOMIZED	PARALLEL	None (Open Label)	1	Pembrolizumab	1	1							1									1
NCT02407171	Evaluating the Combination of MK-3475 and Sterotactic Body Radiotherapy in Patients With Metastatic Melanoma or NSCLC	2015	COMPLETED		YES	IV	ADULT, OLDER_ADULT	University	OTHER	North America	INTERVENTIONAL	PHASE1|PHASE2	≥50,<100	Single	TREATMENT	NON_RANDOMIZED	PARALLEL	None (Open Label)	1	Pembrolizumab	1	1							1									1
NCT02343952	Consolidation Pembrolizumab Following Chemoradiation in Patients With Inoperable/Unresectable Stage III NSCLC	2015	COMPLETED		YES	III	ADULT, OLDER_ADULT	Research Institutions	OTHER	North America	INTERVENTIONAL	PHASE2	≥50,<100	Multi	TREATMENT	NA	SINGLE_GROUP	None (Open Label)	1	Pembrolizumab
NCT02125461	A Global Study to Assess the Effects of MEDI4736 Following Concurrent Chemoradiation in Patients With Stage III Unresectable Non-Small Cell Lung Cancer	2014	COMPLETED		YES	III	ADULT, OLDER_ADULT	Company	INDUSTRY	North America	INTERVENTIONAL	PHASE3	≥500	Multi	TREATMENT	RANDOMIZED	PARALLEL	QUADRUPLE (PARTICIPANT, CARE_PROVIDER, INVESTIGATOR, OUTCOMES_ASSESSOR)	1	Durvalumab
NCT01993810	Comparing Photon Therapy To Proton Therapy To Treat Patients With Lung Cancer	2014	ACTIVE_NOT_RECRUITING		NO	II-III	ADULT, OLDER_ADULT	Oncology Cooperation Organization	NETWORK	North America	INTERVENTIONAL	PHASE3	≥200,<500	Multi	TREATMENT	RANDOMIZED	PARALLEL	None (Open Label)	1	Durvalumab	1	1										1						1
[truncated: 15 more columns]
